## RESEARCH ARTICLE

# Oxygen convective uptakes in gas exchange cycles in early diapause pupae of *Pieris brassicae*

Katrin Jõgar\*, Aare Kuusik, Angela Ploomi, Luule Metspalu, Ingrid Williams, Külli Hiiesaar, Irja Kivimägi, Marika Mänd, Tea Tasa and Anne Luik

Estonian University of Life Sciences, Institute Agricultural and Environmental Sciences, Department of Plant Protection, Kreutzwaldi 1, Tartu 51014, Estonia

\*Author for correspondence (katrin.jogar@emu.ee)

Accepted 28 May 2011

### SUMMARY

Oxygen convective uptakes in gas exchange cycles were directly recorded in early diapause pupae of *Pieris brassicae* L. (Lepidoptera; Pieridae) by means of O<sub>2</sub> coulometric respirometry. This method was combined with flow-through CO<sub>2</sub> respirometry, the two systems being switchable one to the other. During recording with both systems, measurements were also taken with infrared actography. The pupae displayed short discontinuous gas exchange cycles lasting 40–70 min. No true C phase was found by flow-through measurements; instead, flutter opening of the spiracles with discrete convective O<sub>2</sub> uptakes began shortly after the O phase whereas CO<sub>2</sub> release was suppressed by the inward directed passive suction ventilation. The F phase was characterized by a series of small CO<sub>2</sub> bursts (flutter events). Between these bursts, novel sub-phase ‘miniflutter’ was observed, which consisted of six to 10 miniature inspirations without any CO<sub>2</sub> emission. During the flow-through measurements, oxygen convective uptakes were indirectly recorded by the infrared actograph as sudden extensions (lengthening) of the abdominal segments at each spiracular microopening.

Key words: oxygen uptake, *Pieris brassicae*, gas exchange cycle, butterfly, flutter, coulometric respirometry.

### INTRODUCTION

Breathing in many insects is characterised by discontinuous gas exchange cycles (DGCs), during which carbon dioxide is released periodically. To date, the focus of studies of DGCs has been on CO<sub>2</sub> release as measured by flow-through CO<sub>2</sub> respirometry, whereas O<sub>2</sub> consumption during the DGC has been little studied.

Classically, the DGC consists of three phases (Schneiderman, 1960; Lighton, 1996; Chown and Nicolson, 2004). During the open (O) phase, the spiracles are open and CO<sub>2</sub> is released in a burst. The O phase is followed by the facultative closed (C) phase, when the spiracles are closed and little or no gas exchange occurs. Within the C phase, sub-atmospheric pressure is created in the tracheae because of O<sub>2</sub> consumption by the tissues and CO<sub>2</sub> buffering by means of bicarbonates in the tissue and haemolymph (Wobschall and Hetz, 2004). After the C phase, the flutter (F) phase occurs, during which the spiracles open and close rapidly in succession (fluttering). When open, air is sucked through the spiracles into the tracheae by convection along the negative pressure gradient. This is known as passive suction ventilation (PSV); thus PSV occurs in the absence of muscular movement (see Miller, 1974; Miller, 1981). PSV during the F phase has been described as a mechanism for restricting water loss in insects (see Kestler, 1978; Kestler, 1982; Kestler, 1991). DGC is regarded as CFO cycles when CO<sub>2</sub> bursts are not actively ventilated by abdominal pumping, but as CFV (V, ventilation) cycles when the CO<sub>2</sub> bursts are associated with pumping movements (Kestler, 1985; Kestler, 2003).

Discontinuous O<sub>2</sub> uptakes and CO<sub>2</sub> release during the O phase has been demonstrated in some Carabidae beetles and in pupae of the *Cecropia* moth, *Hyalophora cecropia*, using heat conductivity

detectors or diaferometers (Punt et al., 1957). Simultaneous measurements of O<sub>2</sub> uptake and CO<sub>2</sub> release by flow-through respirometry in the tok-tok beetle, *Psammodes striatus*, showed a peak of O<sub>2</sub> consumption at the beginning of the O phase, together with a burst of CO<sub>2</sub> release (Lighton, 1988). Oxygen uptake also peaked during the release of CO<sub>2</sub> in the giant burrowing cockroach, *Macropanesthia rhinoceros* (Woodman et al., 2007).

The F phase cannot be detected by flow-through O<sub>2</sub> respirometry without a significant diffusive component, because the inward bulk flow of air into the tracheal system is functionally equivalent to a minute and probably undetectable reduction in the flow rate of air through the respirometer chamber (Lighton, 1988; Lighton, 1994). Thus, single microopenings of the spiracles and air convective uptakes into the tracheae cannot be detected by flow-through respirometry.

Special techniques are required to record PSV during microopening of the spiracles in the F phase. Schneiderman used cannulated spiracles to measure partial pressure and thus described the rhythms of passive air uptake in silkworm pupae (*H. cecropia*) (Schneiderman, 1960). Sláma recorded a sawtooth pattern of abdominal retractions with contact transducers in lepidopteran pupae (including the large cabbage white *Pieris brassicae*) (Sláma, 1984; Sláma, 1988). This pattern was caused by the microopening of the spiracles and passive inspirations. A similar pattern of passive inspirations was recorded by Sláma and Neven in young pupae of the codling moth, *Cydia pomonella* (Sláma and Neven, 2001). Hetz et al. used miniaturized amperometric sensors to make direct O<sub>2</sub> measurements within the tracheal system of lepidopteran pupae (Hetz et al., 1994). Wobschall and Hetz recorded O<sub>2</sub> uptake directly

in diapausing Atlas moth (*Attacus atlas*) pupae by simultaneous measurements of tracheal pressure and volume changes (plethysmometry) in the tracheal system, while combining CO<sub>2</sub> measurements by flow-through respirometry (Wobschall and Hetz, 2004). Coulometric (volumetric-manometric) respirometry has been used to directly record O<sub>2</sub> convective uptakes in diapausing 2–5-month old pupae of the cabbage moth, *Mamestra brassicae* (Jögar et al., 2007), and *P. brassicae* (Jögar et al., 2004; Jögar et al., 2005; Jögar et al., 2008). However, there is a lack of information about the gas exchange patterns, including O<sub>2</sub> convective uptake during the initiation phase of diapause (early diapause) (see Košťál, 2006; Belozarov, 2009).

Coulometric respirometry was combined with flow-through CO<sub>2</sub> respirometry. We suppose that the flutter events observed by coulometric O<sub>2</sub> measurements can usefully be directly compared with flow-through CO<sub>2</sub> respirometry.

The main aim of the present investigation was to describe the pattern of O<sub>2</sub> convective uptakes and associated body movements in young pupae of *P. brassicae*. To achieve this, coulometric O<sub>2</sub> respirometry was combined with flow-through CO<sub>2</sub> respirometry, and discrete O<sub>2</sub> discrete uptake was simultaneously recorded indirectly using an infrared (IR) actograph.

## MATERIALS AND METHODS

### Insects

For laboratory experiments, eggs of *Pieris brassicae* (Linnaeus 1758) (second generation) were collected from cabbage fields near Tartu, Estonia (58°23'N, 26°41'E), during July and August 2009. They were reared in a laboratory under short-day conditions (12 h:12 h light:dark) at 21±1°C and ambient air humidity (55–65% relative humidity). The larvae that hatched from the eggs were fed on leaves cut from cabbage plants, which were replaced with a fresh supply daily. After pupation, each pupa was placed in an Eppendorf tube and kept in laboratory conditions.

For the experiments, twenty-five 2 week old (14±2 days) pupae were used. Each pupa was weighed to 0.1 mg with an analytical balance before experimentation (Explorer Balances, max. 62 g; Ohaus Corporation, Nänikon, Switzerland). Pupal body mass ranged from 0.383 to 0.411 g (Table 1). During respiratory measurements, temperature and humidity conditions were recorded using a digital HygroClip probe (HygroPalm, Rotronic Company, Basserdorf, Switzerland). All measurements were made at 21±1°C and ambient air humidity (50–55% relative humidity). The Eppendorf tube with pupa was used as the insect chamber in the respiratory systems; this avoided handling stress. The respiratory measurements of the first 30 min were discarded; recordings in both systems lasted at least

Table 1. Characteristics (mean ± s.d.) of the discontinuous gas exchange cycle in 2 week old pupae of *Pieris brassicae* (N=25) in the initiation phase of diapause

|                                                                   |              |
|-------------------------------------------------------------------|--------------|
| Body mass (g)                                                     | 0.397±0.014  |
| Metabolic rate                                                    |              |
| V <sub>CO<sub>2</sub></sub> (ml g <sup>-1</sup> h <sup>-1</sup> ) | 0.042±0.0057 |
| V <sub>O<sub>2</sub></sub> (ml g <sup>-1</sup> h <sup>-1</sup> )  | 0.051±0.0027 |
| Discontinuous gas exchange cycle                                  |              |
| Frequency (mHz)                                                   | 0.26±0.0002  |
| Period (min)                                                      | 58.25±11.72  |
| Small bursts of CO <sub>2</sub> during flutter                    |              |
| Number                                                            | 25.06±3.69   |
| Frequency (mHz)                                                   | 12.20±0.32   |
| Period (s)                                                        | 90.75±13.19  |
| Oxygen uptakes between two flutter bursts                         | 7.49±2.63    |

3 h. Tests with each individual were made twice. We confirmed, with preliminary experiments, that the switch from still air to flowing air (120 ml min<sup>-1</sup>) and *vice versa* did not significantly change the frequency of the DGC. Body movements were visually observed under a stereomicroscope (SZ-ZTW, Olympus, Japan).

### Coulometric respirometry

Coulometric respirometers usually work in an interrupted regime (on–off) of electrolysis (e.g. Heusner et al., 1982). By contrast, our coulometric respirometry (a volumetric manometric system) was characterised by a continuously (uninterrupted) O<sub>2</sub>-compensating system (Kuusik, 1977; Kuusik et al., 1996; Tartes et al., 1999; Tartes et al., 2002). This setup has also been described by Lighton (Lighton, 2008). This respirometer ensures continuous and adequate replacement of consumed O<sub>2</sub> with electrolytically produced O<sub>2</sub>. The insect itself plays an active role in this self-regulating system. The rates of O<sub>2</sub> production and O<sub>2</sub> consumption by the insect are indicated on graphs as V<sub>O<sub>2</sub></sub> (ml h<sup>-1</sup>). The system also records transient changes in the rate of release of CO<sub>2</sub>. In our respirometer, we did not use the switching electrodes of electrolysis; instead, the electrolysis current was directly connected with a photoelement. High sensitivity of the respirometer to pressure changes in the respiration chamber was achieved by replacing the standard photodiode with the photosensitive element of a transistor (KT302A, Semitronics, Freeport, NY, USA), which has a very small photosensitive area (approximately 0.5 mm<sup>2</sup>). In this way, the smallest movement in the meniscus of ethanol inside the U-shaped capillary was reflected as a signal on the recording trace (Fig. 1). The electrolysis current depended on the intensity of the light falling on the phototransistor. The ethanol meniscus in the glass capillary served as a shutter to screen the photosensitive area from light. The electrochemical equivalent of O<sub>2</sub> generation has been reported as 209.5 µl O<sub>2</sub> mA<sup>-1</sup> h<sup>-1</sup> (Taylor, 1977). This value was used to convert

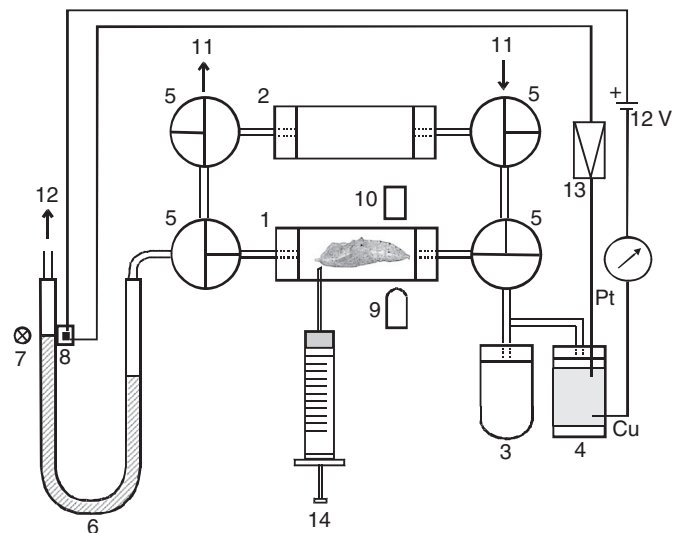

Fig. 1. Design of the electrolytic continuously O<sub>2</sub>-compensating differential volumetric-manometric closed-system respirometer. 1, Insect chamber with pupa; 2, empty insect chamber; 3, vessel with potassium hydroxide solution; 4, electrolysis unit, CuSO<sub>4</sub> solution with platinum (Pt), and copper (Cu) electrodes; 5, taps for switching from volumetric-manometric respirometry to flow-through CO<sub>2</sub> respirometry; 6, glass capillary half-filled with ethanol; 7, light source; 8, photo transistor; 9, infrared (IR) emitter diode; 10, IR sensor diode; 11, connections to the flow-through respirometry system; 12, compensating vessel; 13, current amplifier; 14, microsyringe.

the readings of the event recorder to O<sub>2</sub> consumption values ( $\mu\text{l O}_2 \text{ h}^{-1}$  or  $\mu\text{mol O}_2 \text{ h}^{-1}$ ).

The coulometric respirometer allowed simultaneous recording of O<sub>2</sub> consumption, sudden O<sub>2</sub> (air) uptake (known as PSV) by convection into the tracheae at microopenings of the spiracles, discrete CO<sub>2</sub> releases by bursts, abdominal pumping movements and heartbeat patterns (see Jõgar et al., 2004; Jõgar et al., 2007). Rapid changes in pressure (lasting seconds) in the insect chamber, caused by active body movements of the insect or other rapid events, were not compensated and led to corresponding rapid changes in the electrolysis current, reflected as spikes on recordings. Thus, our coulometric respirometer also served as an activity detector.

A rapid O<sub>2</sub> convective uptake resulted in adequate air volume decrease in the insect chamber and the ethanolic meniscus shifted down by a fraction of a millimetre. As a result, more light fell on the sensitive area of the transistor and an upward signal was recorded (Fig. 2). Downward signals indicated CO<sub>2</sub> release by bursts (Tartes et al., 1999). The volume of air uptake was estimated by extracting air from the insect chamber with a microsyringe (1  $\mu\text{l}$  volume, Agilent Technologies, Espoo, Finland). The calibration of convective air uptake is shown in Fig. 2.

#### Flow-through CO<sub>2</sub> respirometry

The infrared gas analyser or flow-through CO<sub>2</sub> respirometer (Infralyt-4, Saxon Junkalor GmbH, Dessau, Germany) was used to confirm that the presumed CO<sub>2</sub> signals, i.e. the downward spikes on the recording trace of the electrolytic respirometer, were actually due to CO<sub>2</sub> bursts, and to measure them quantitatively. The respirometer was calibrated at different flow rates by means of calibration gases (Trärgase, Saxon Junkalor GmbH) and with gas injection. An air flow rate of 120 ml min<sup>-1</sup> was used. The insect chamber could be switched either to the flow-through CO<sub>2</sub> respirometer or to the coulometric respirometer without disturbing the insect (Fig. 1). During the measurements with coulometric respirometry, the empty respiration chamber served to determine the baseline of the measurements.

#### IR actography

Both the coulometric (electrolytic) respirometer and the flow-through respirometer were combined with an IR insect cardiograph (opto-cardiography); we refer to this as the IR actograph, because

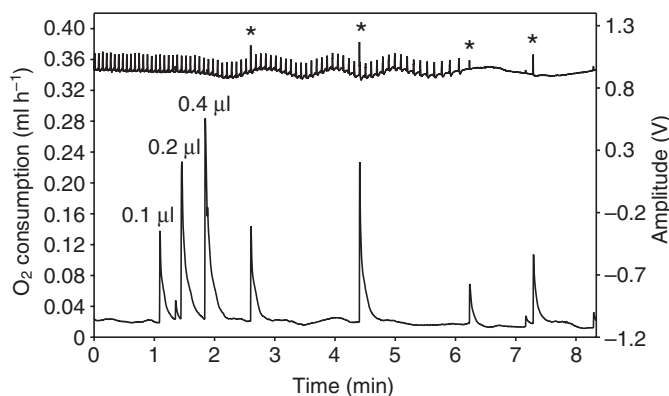

Fig. 2. Calibration with different volumes of air extracted from the insect chamber by means of coulometric measurements (lower trace, three left spikes). The other four spikes are caused by sudden oxygen uptake by *Pieris brassicae* pupae, which are synchronous with abdominal extensions (asterisks) (upper trace, IR probe actograph). By these measurements, the volume of first oxygen uptake was 0.1  $\mu\text{l}$  and the second was 0.2  $\mu\text{l}$ .

it records not only heartbeats but also all other abdominal contractions, including muscular ventilation. An IR-emitting diode was placed on one side of the respirometer chamber near the ventral side of the abdomen, while an IR-sensitive diode (TSA6203, Mikrotechna, Prague, Czech Republic) was placed on the opposite side of the chamber (see Metspalu et al., 2001; Metspalu et al., 2002). The light from the IR diode (BP104, Mikrotechna) was modulated by contractions of the heart and skeletal muscles. The level of output voltage reflected the vigour of the muscular contractions of the insect (Hetz et al., 1999). Sudden extensions (lengthening) of abdominal segments (PSV) are recorded as relatively long upward spikes synchronous with microopenings of the spiracles (Figs 3, 4). Weak regular muscular contractions of the abdomen resulted in two-phased relatively short spikes on the recording traces we refer to as abdominal pulsations (Fig. 5). Regular, high-frequency, low-amplitude signals were interpreted as heartbeats (Fig. 3).

#### Data acquisition and statistics

Computerised data acquisition and analysis were performed using DAS 1401 A/D hardware and TestPoint software (Keithley, Metrabyte, Cleveland, OH, USA) with a sampling rate of 10 Hz. Four bipolar channels allowed simultaneous recording of four events. Mean ( $\pm$ s.d.) standard metabolic rate was calculated automatically using STATISTICA (version 8, StatSoft, Tulsa, OK, USA). Statistical comparisons were made with one-way ANOVA (analysis of variance). Significant ANOVAs were followed with the Fisher's least significant difference (LSD) test. The significance level was set at  $P < 0.05$ .

#### RESULTS

At the initiation phase of diapause (14  $\pm$  2 days old), *P. brassicae* pupae displayed DGCs lasting 40–70 min (Table 1), whereas the duration of CO<sub>2</sub> release by burst was 2–6 min (3.1  $\pm$  0.1). Recordings by flow-through respirometry showed a typical pattern. After the O-phase CO<sub>2</sub> emission had ceased, the C phase began, which was followed by the F phase with small bursts of CO<sub>2</sub> release (Fig. 3). No true C phase was found by flow-through respirometry. Shortly after the end of the O phase, coulometry revealed convective O<sub>2</sub> uptake. During this time, CO<sub>2</sub> release was suppressed by the inward-directed PSV. This convective O<sub>2</sub> uptake indicates an earlier beginning of the F phase than detectable with the flow-through

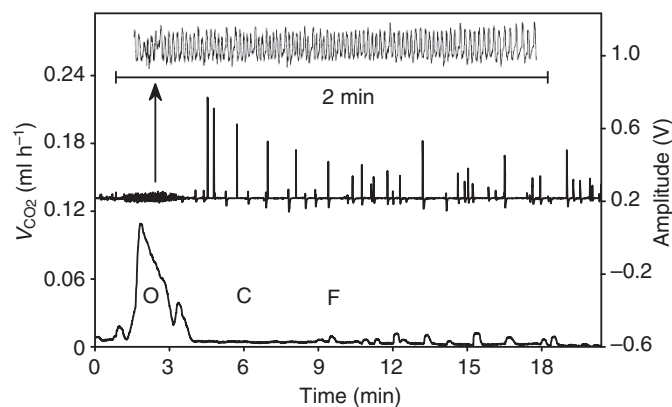

Fig. 3. Discontinuous gas exchange in *P. brassicae* pupa recorded with CO<sub>2</sub> respirometry. Note the discrete small bursts of the F phase (lower trace). The upper trace shows a series of abdominal extensions or lengthening (upper spikes) due to microopening of the spiracles and O<sub>2</sub> uptakes (IR probe actograph); the abdominal movements during O phase were identified as heartbeats.

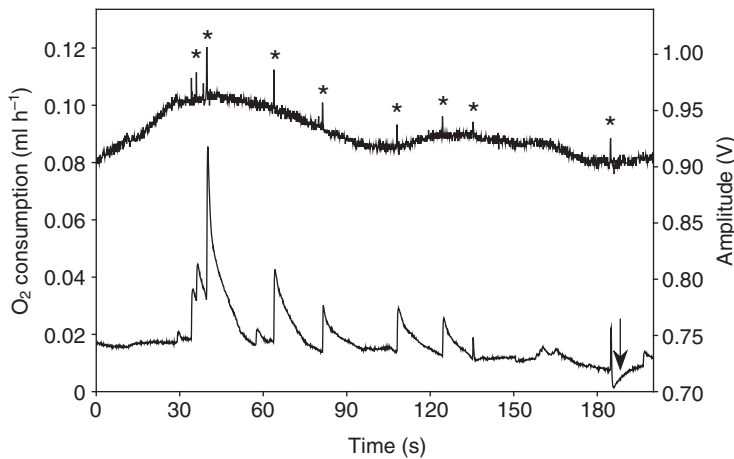

Fig. 4. Typical pattern of convective  $O_2$  uptake by coulometric respirometry recorded in *P. brassicae* pupa at the time that corresponded to the closed phase by the flow-through  $CO_2$  respirometer. The spikes are gradually shortened due to the pressure rises inside the trachea. Asterisks (upper trace) indicate the extensions (lengthening) of abdominal segments. Arrow indicates a  $CO_2$  release by miniburst.

system. Thus the F phase lengthened on account of the C phase. At each microopening of the spiracles and passive convective oxygen uptake event, signals of abdominal lengthening were recorded (Figs 3, 4). Recordings of coulometric respirometry showed clear, gradually shortened signals due to convective oxygen uptake (Fig. 4). Each of the two to three first microopenings and  $O_2$  uptakes lasted less than 0.5 s. Oxygen convective uptakes during the interburst period increased metabolic rate by 5–6% compared with the metabolic rate when these uptakes were absent. Flow-through measurements also indicated abdominal lengthening concurrent with the small bursts of  $CO_2$  during flutter (Fig. 5).

Between two large  $CO_2$  bursts, a series of small bursts of  $CO_2$  were recorded by coulometric respirometry (Fig. 6A). Each small burst started with a brief uptake of air into the tracheae, recorded by the IR actograph as a sudden extension of the abdomen, indirectly indicating air ( $O_2$ ) uptake (Fig. 5). Between two consecutive small  $CO_2$  bursts, a series of air uptakes (miniature inspirations) were recorded, which we considered as 'miniflutter' (Fig. 6A,B; Table 1). These uptakes were irregular with respect to spike height and interval. During such miniflutters, no emissions of  $CO_2$  were recorded.

Simultaneous recording with the IR actograph during flow-through  $CO_2$  respirometry indicated that pupae differed in the type of body movement associated with the respiratory patterns of  $CO_2$  release. In some pupae,  $CO_2$  bursts were always concurrent with abdominal ventilating movements (CFV cycles) (always group,  $N=9$ ) (Fig. 7A), whereas in others (occasionally group,  $N=10$ ), only some  $CO_2$  bursts were concurrent with abdominal ventilating movements

(Fig. 7B). In a few pupae (never group,  $N=6$ ),  $CO_2$  bursts occurred without active ventilation (CFO cycles) (Fig. 7C). Ventilating movements (amplitude 1–2 V) associated with  $CO_2$  bursts were visible externally as twisting abdominal movements.

Active ventilation during the bursts of  $CO_2$  showed individual variation in the vigour of contractions and their number (from one to 15). In pupae with only one to five muscular (active) ventilating movements accompanying the burst, as well as in those lacking active ventilation, a relatively low level of  $CO_2$  release was observed. In contrast, pupae with vigorously ventilated bursts showed a significantly higher level of  $CO_2$  release (Fig. 7A). Each burst lasted 3–6 min in the always group of pupae, but 2–2.5 min in the occasionally and never groups. Statistical comparison of  $CO_2$  release frequency (ANOVA,  $F_{2,4,2}=41.8$ ,  $P>0.05$ ) did not show a significant difference. The energy cost of muscular ventilation during a burst was not studied.

Abdominal two-phase regular contractions ( $5\text{--}7\text{ min}^{-1}$ ) of low amplitude (0.2–0.3 V) (referred to as abdominal pulsations) (Fig. 5, Fig. 6B) occurred periodically; these were not visible externally.

In some pupae showing no active ventilation during  $CO_2$  release by bursts, very regular low amplitude (0.1–0.2 V) pulsations ( $57\text{--}70\text{ min}^{-1}$ ) were recorded; these we interpreted as heartbeats (Fig. 3).

## DISCUSSION

Our results showed that, in the initiation phase of diapause, *P. brassicae* pupae display relatively short DGCs (40–70 min), with  $CO_2$  bursts lasting 2–6 min. This contrasts with earlier studies, using

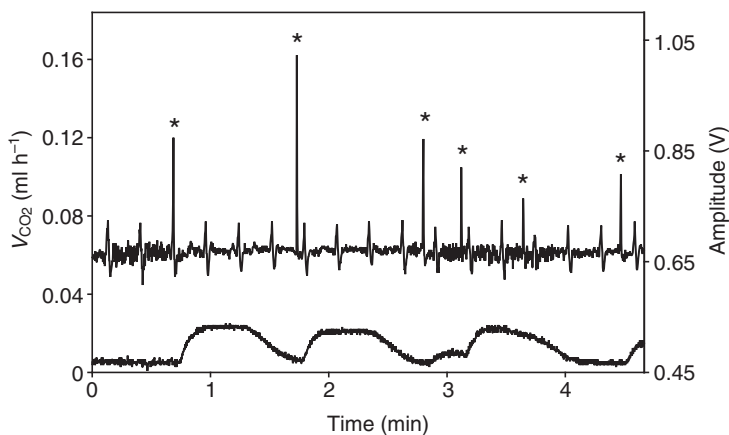

Fig. 5. Three small discrete bursts of  $CO_2$  (lower trace) during flutter in a *P. brassicae* pupa, recorded with flow-through respirometry. The upper trace is a simultaneous recording from the IR probe actograph showing abdominal pulsations as two-phase signals (smaller spikes) and abdominal extensions (spikes indicated by asterisks). At the beginning of each small burst, abdominal extension (lengthening) occurred due to microopening of the spiracles and air convective uptake.

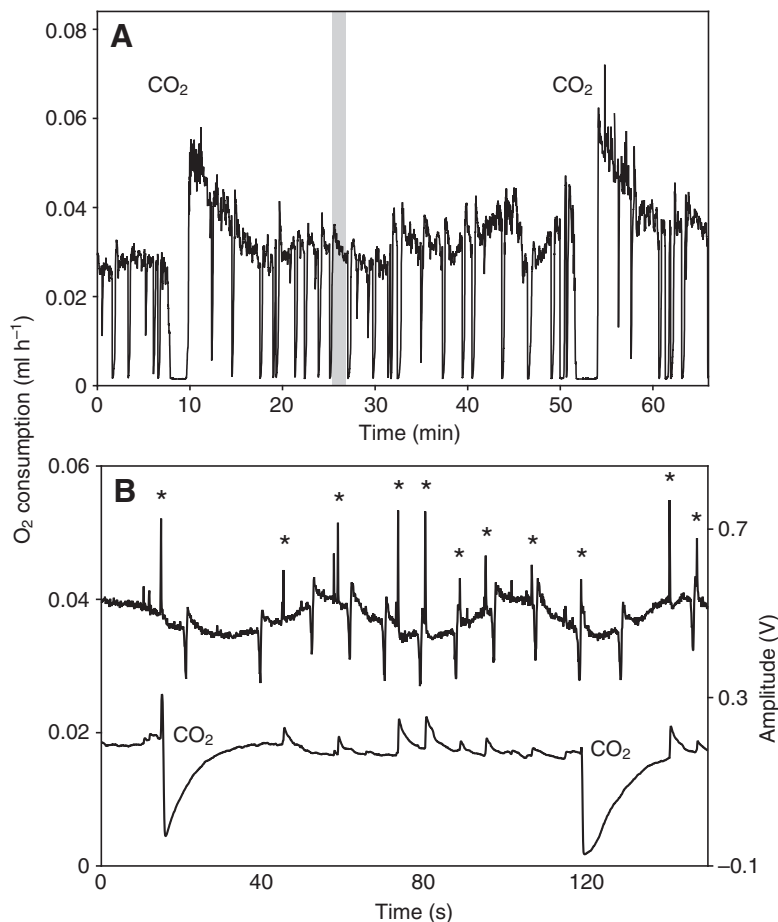

Fig. 6. (A) A discontinuous gas exchange cycle in a *P. brassicae* pupa recorded by coulometric respirometry, showing an interburst period with small O phases (small CO<sub>2</sub> bursts). (B) Detail of the shaded area in A. The lower trace (coulometric respirometry) shows the convective uptake of air at the microopening (mini-flutter) of the spiracles between two small bursts of CO<sub>2</sub>, recorded in pupae of *P. brassicae*. The upper trace is a simultaneous recording from the IR probe actograph showing abdominal pulsations (downward spikes) and sudden abdominal extension (lengthening) at each microopening of the spiracles (upward spikes indicated by asterisks).

*P. brassicae* pupae more than 2 months old, which displayed longer DGCs (8–23 h) (Harak et al., 1999; Jõgar et al., 2004; Jõgar et al., 2005) with CO<sub>2</sub> bursts lasting 13–18 min (Harak et al., 1999; Kuusik et al., 1980; Tartes et al., 1999). The young pupae we used with their short DGCs were convenient for studying flutter events. They had a relatively high metabolic rate; in 2–3 month old pupae metabolic rate is at least two times lower (12–28 ml O<sub>2</sub> g<sup>-1</sup> h<sup>-1</sup>) (Kuusik 1977; Jõgar et al., 2004; Jõgar et al., 2005).

Commonly, after the O phase, a period with no CO<sub>2</sub> release occurs (C phase); later, the CO<sub>2</sub> level was marginally elevated (F phase) (Chown et al., 2006). The present study revealed that in young *P. brassicae* pupae, the DGC measured with flow-through respirometry was characterised by a C phase, at the end of which a series of O<sub>2</sub> convective uptakes was found. Thus, the C phase in those pupae was not as closed as previously thought. Between two large CO<sub>2</sub> bursts, almost regular small CO<sub>2</sub> bursts were recorded. Each small burst started with sudden uptake of air into the trachea (PSV). The main finding in the present study was a series of irregular microopenings of the spiracle(s) with convective O<sub>2</sub> uptakes (mini-flutter) found between small bursts. During the mini-flutter, no recordable CO<sub>2</sub> emission occurred.

There are several examples where the interburst period consists of discrete small CO<sub>2</sub> bursts. Such bursts were described by Lighton (Lighton, 1988) in the tok-tok beetle, *P. striatus*; in this beetle, each burst was accompanied by active abdominal movement. Discrete CO<sub>2</sub> emissions during the F phase have also been reported by Duncan et al. in the tenebrionid beetle, *Pimelia grandis* (Duncan et al., 2002), and by Kovac et al. in resting honeybees *Apis mellifera* (Kovac et al., 2007). However, spiracle openings within the F phase

were commonly observed to be irregular with respect to frequency and amplitude, if inferred from the CO<sub>2</sub> release pattern (e.g. Wobshall and Hetz, 2004).

Our flow-through CO<sub>2</sub> measurements showed no CO<sub>2</sub> release for a short time after the O phase. The coulometric respirometry and IR actographic recordings showed rapid and clear uptakes of air shortly after the O phase, indicating the beginning of the F phase. An earlier study by Tartes et al. revealed that air convective uptakes began immediately after the O phase (Tartes et al., 2002). Air convective uptakes, shortly after large CO<sub>2</sub> bursts, also occurred in old diapausing *M. brassicae* pupae (Jõgar et al., 2007). We suggest that, at the beginning of the flutter, air uptakes were convective but later were diffusive-convective. These results concur with the plethysmometry flow-through measurements of Wobshall and Hetz (Wobshall and Hetz, 2004), revealing that the convective uptakes of O<sub>2</sub> dominate at the beginning of the flutter phase but that, in the later F phase, diffusion takes over from convection as the chief mechanism of O<sub>2</sub> uptake. Wobshall and Hetz showed that, in diapausing moth pupae (*A. atlas*), uptake of air into the tracheal system at the beginning of the F phase along the negative hydrostatic pressure gradient may initially inhibit CO<sub>2</sub> release from the tracheae (Wobshall and Hetz, 2004). We suppose that, at the beginning of the F phase of *P. brassicae* pupae, CO<sub>2</sub> emission was also inhibited. One may suppose that water is conserved only at the beginning of the F phase when clear convective O<sub>2</sub> uptakes (PSV) occur, but not later when diffusion is the dominating mechanism of the fluttering period.

The duration of the F phase may be underestimated, as the F phase may start before the CO<sub>2</sub> measurements can detect it (Hetz

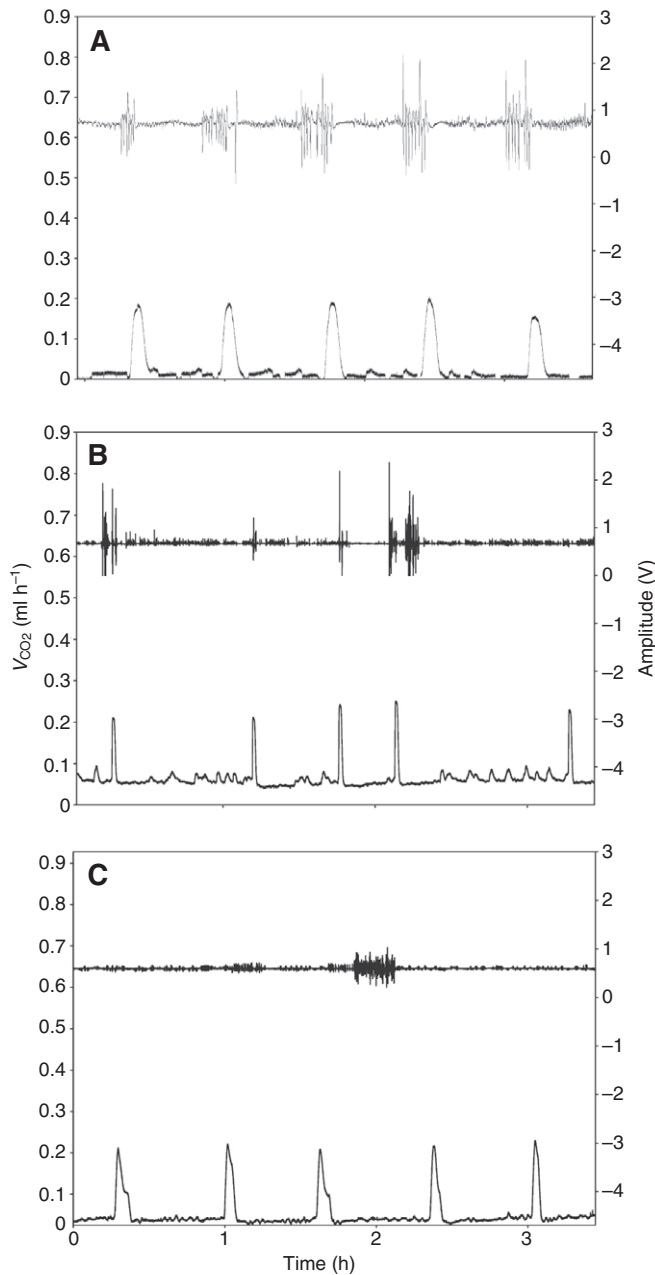

Fig. 7. Examples of individual variation in early diapause pupae of *P. brassicae* in the types of gas exchange patterns taking in account visible body movements: (A) CO<sub>2</sub> release by bursts accompanied by active ventilation (twisting abdominal movements) (CFV cycles); (B) CO<sub>2</sub> release by bursts with only some accompanied by active ventilation; (C) CO<sub>2</sub> release by bursts with no active ventilation (CFO cycles). The upper trace shows recordings of IR probe actograph and the lower trace recordings of flow-through respirometry.

et al., 1994; Wobschall and Hetz, 2004). In pupae of *P. brassicae*, the duration of the F phase may also be longer than estimated by the flow-through system, as far as CO<sub>2</sub> release was prevented at the beginning of the F phase by convective air uptakes. Wobschall and Hetz showed that small volume and pressure decreases occurred between the microopenings in the F phase (Wobschall and Hetz, 2004). This confirmed a small but significant contribution of suction ventilation during each microopening (see also Kestler,

1985). In our measurements in *P. brassicae* pupae, each miniature inspiration was synchronised with rapid extension of the abdomen, confirming that a convective component was always present in O<sub>2</sub> uptakes. We observed in *P. brassicae* a relatively longer flutter phase compared with that in some other insects, such as the carabid *Pterostichus niger* (Kivimägi et al., 2011) and the bumblebee *Bombus terrestris* (Karise et al., 2010).

Gas exchange patterns are known to vary between and within individuals (see Chown, 2001; Chown et al., 2002; Marais and Chown, 2003). In the present study, variation was found between individuals in the duration of CO<sub>2</sub> release and metabolic rates, but not in DGC frequency. Individuals displayed different gas exchange cycles. Most showed DGCs with all CO<sub>2</sub> bursts actively ventilated, a few with no bursts actively ventilated, and others with only some bursts actively ventilated.

Beside active ventilation, some other types of body movements, differing in frequency and amplitude, were observed in the present study. The regular but periodically occurring abdominal pulsations in *P. brassicae* pupae correspond, in our opinion, to the extracardiac hemocoelic pulsations described in lepidopteran pupae (Sláma, 1984; Sláma, 1999). These pulsations and other abdominal movements play an important role in the regulation of pupal respiration and haemolymph circulation (Sláma and Neven, 2001). In *P. brassicae* pupae, we interpreted high-frequency but low-amplitude signals, accompanied by CO<sub>2</sub> release in bursts, as heartbeats. In a previous study using thermographic measurements, we demonstrated heartbeat reversal, correlated with gas exchange cycles and twisting abdominal movements in diapausing *P. brassicae* pupae (Jögar et al., 2005). Heartbeat reversal correlated with gas exchange cycles has also been reported in saturniid moth pupae (Wasserthal, 1996; Hetz et al., 1999; Sláma, 2003).

Manometric O<sub>2</sub> respirometry methods have been criticized and their readings mistrusted because these methods usually do not allow separation of active and resting metabolism (see Van Voorhies et al., 2008). Nevertheless, some volumetric manometric methods, including our coulometric respirometry, are regarded as useful (Klok and Chown, 2005). We are convinced that in gas exchange studies of insects, coulometric respirometry supplemented by the flow-through method has clear advantages. Lighton pointed out that coulometric continuously recording respirometry deserves to be more widely used (Lighton, 2008).

In summary, in this study we have shown that the pattern of gas exchange in *P. brassicae* pupae may be effectively investigated by the combined use of coulometric respirometry and flow-through CO<sub>2</sub> systems by switching the same respiration chamber from one system to the other without disturbing the insect. By combining IR actography in parallel with both types of respirometry, it was possible to record rapid air uptakes. Thus, on our recording traces, the patterns of microopenings of the spiracles were clearly indicated.

#### ACKNOWLEDGEMENTS

The research was supported by the Estonian Science Foundation (grant nos 7130 and 6722) and Estonian target financing project no. SF170057s09. We thank the editor and two anonymous reviewers, who provided helpful and much-appreciated comments on earlier drafts of the manuscript.

#### REFERENCES

- Belozero, V. N. (2009). New aspects in investigations of diapause and non-diapause dormancy types in insects and other arthropods. *Entomol. Rev.* **89**, 127-136.
- Chown, S. L. (2001). Physiological variation in insects: hierarchical levels and implications. *J. Insect Physiol.* **47**, 649-660.
- Chown, S. L. and Nicolson, S. W. (2004). *Insect Physiological Ecology: Mechanisms and Patterns*. Oxford: Oxford University Press.

- Chown, S. L., Addo-Bediako, A. and Gaston, K. J.** (2002). Physiological variation in insects: large-scale patterns and their implications. *Comp. Biochem. Physiol.* **131B**, 587-602.
- Chown, S. L., Gibbs, A. G., Hetz, S. K., Klok, C. J., Lighton, J. R. B. and Marais, E.** (2006). Discontinuous gas exchange in insects: a clarification of hypotheses and approaches. *Physiol. Biochem. Zool.* **79**, 333-343.
- Duncan, F. D., Krasnov, B. and McMaster, M.** (2002). Novel case of a tenebrionid beetle using discontinuous gas exchange cycle when dehydrated. *Physiol. Entomol.* **27**, 79-83.
- Harak, M., Lamprecht, I., Kuusik, A., Hiiesaar, K., Metspalu, L. and Tartes, U.** (1999). Calorimetric investigations of insect metabolism and development under the influence of a toxic plant extract. *Thermochim. Acta* **333**, 39-48.
- Hetz, S. K., Wasserthal, L. T., Hermann, S., Kaden, H. and Oelssner, W.** (1994). Direct oxygen measurements in the tracheal system of lepidopterous pupae using miniaturized amperometric sensors. *Bioelectrochem. Bioenerg.* **33**, 165-170.
- Hetz, S. K., Psota, E. and Wasserthal, L. T.** (1999). Roles of aorta, ostia and tracheae in heartbeat and respiratory gas exchange in pupae of *Troides rhadamantus* Staudinger 1888 and *Ornithoptera priamus* L. 1758 (Lepidoptera, Papilionidae). *Int. J. Insect Morphol.* **28**, 131-144.
- Heusner, A. A., Hurlley, J. P. and Arbogast, T. R.** (1982). Coulometric microrespirometry. *Am. J. Physiol.* **243**, 185-192.
- Jõgar, K., Kuusik, A., Metspalu, L., Hiiesaar, K., Luik, A., Mänd, M. and Martin, A.-J.** (2004). The relations between the patterns of gas exchange and water loss in diapausing pupae of large white butterfly *Pieris brassicae* (Lepidoptera: Pieridae). *Eur. J. Entomol.* **101**, 467-472.
- Jõgar, K., Metspalu, L., Hiiesaar, K., Luik, A., Martin, A.-J., Mänd, M., Jaaniso, R. and Kuusik, A.** (2005). Physiology of diapauses in pupae of *Pieris brassicae* L. (Lepidoptera: Pieridae). *Agron. Res.* **3**, 21-37.
- Jõgar, K., Kuusik, A., Metspalu, L., Hiiesaar, K. and Luik, A.** (2007). Rhythms of passive and active ventilation, and circulation recorded in diapausing pupae of *Mamestra brassicae* using constant volume respirometry. *Physiol. Entomol.* **3**, 246-252.
- Jõgar, K., Kuusik, A., Metspalu, L., Hiiesaar, K., Grishakova, M. and Luik, A.** (2008). Effects of Neem EC on gas exchange, tracheal ventilation, and water loss in diapausing pupae of *Pieris brassicae*. *Entomol. Exp. Appl.* **126**, 165-173.
- Karise, R., Kuusik, A., Mänd, M., Metspalu, L., Williams, I. H., Hiiesaar, K., Luik, A., Muljar, R. and Liiv, K.** (2010). Gas exchange patterns of bumble bee foragers before and after exposing to lowered temperature. *J. Insect Physiol.* **56**, 529-535.
- Kestler, P.** (1978). Atembewegungen und Gasaustausch bei Ruheatmung adulter terrestrischer Insekten. *Verh. Dtsch. Zool. Ges.* **1978**, 269.
- Kestler, P.** (1982). Wie verhindern Stigmen den Wasserverlust? *Verh. Dtsch. Zool. Ges.* **1982**, 262.
- Kestler, P.** (1985). Respiration and respiratory water loss. In *Environmental Physiology and Biochemistry of Insects* (ed. K. H. Hoffman), pp. 137-281. Berlin: Springer.
- Kestler, P.** (1991). Cyclic CO<sub>2</sub> release as a physiological stress indicator in insects. *Comp. Biochem. Physiol.* **100C**, 207-211.
- Kestler, P.** (2003). Physiological gas exchange strategies for spiracular control. *Comp. Biochem. Physiol.* **134A Suppl.**, 73-74.
- Kivimägi, I., Kuusik, A., Jõgar, K., Ploomi, A., Williams, I. H., Metspalu, L., Hiiesaar, K., Sibul, I., Mänd, M. and Luik, A.** (2011). Gas exchange patterns of *Pterostichus niger* (Carabidae) in dry and moist air. *Physiol. Entomol.* **36**, 62-67.
- Klok, C. J. and Chown, S. L.** (2005). Temperature- and body mass-related variation in cyclic gas exchange characteristics and metabolic rate of seven weevil species: broader implications. *J. Insect Physiol.* **51**, 789-801.
- Košťál, V.** (2006). Eco-physiological phases of insect diapause. *J. Insect Physiol.* **52**, 113-127.
- Kovac, H., Stabentheiner, A., Hetz, S. K., Petz, M. and Crailsheim, K.** (2007). Respiration of resting honeybees. *J. Insect Physiol.* **53**, 1250-1261.
- Kuusik, A.** (1977). Cyclic gas exchange in diapausing pupae of *Pieris brassicae* L. and *P. rapae* L. (Lepidoptera, Pieridae). *Acad. Sci. Estonian SSR* **26**, 96-101 (in Russian with English summary).
- Kuusik, A., Metspalu, L., Hiiesaar, K., Kogermann, A., Lääts, K., Haldre, Ö. and Reima, T.** (1980). An assaou for juvenile hormone analogs based on their direct and indirect effects revealed in the respiratory metabolism in diapausing pupae of *Pieris brassicae* (Lepidoptera, Pieridae). *Acad. Sci. Estonian SSR* **29**, 198-211 (in Russian with English summary).
- Kuusik, A., Harak, M., Hiiesaar, K., Metspalu, L. and Tartes, U.** (1996). Different types of external gas exchange found in pupae of greater wax moth *Galleria mellonella* (Lepidoptera: Pyralidae). *Eur. J. Entomol.* **93**, 23-35.
- Lighton, J. R. B.** (1988). Simultaneous measurement of oxygen uptake and carbon dioxide emission during discontinuous ventilation in the tok-tok beetle, *Psammodes striatus*. *J. Insect Physiol.* **34**, 361-367.
- Lighton, J. R. B.** (1994). Discontinuous ventilation in terrestrial insects. *Physiol. Zool.* **67**, 142-162.
- Lighton, J. R. B.** (1996). Discontinuous gas exchange in insects. *Annu. Rev. Entomol.* **41**, 309-324.
- Lighton, J. R. B.** (2008). *Measuring Metabolic Rates. A Manual for Scientists*, 201 pp. Oxford: Oxford University Press.
- Marais, E. and Chown, S. L.** (2003). Repeatability of standard metabolic rate and gas exchange characteristics in a highly variable cockroach, *Perisphaeria* sp. *J. Exp. Biol.* **206**, 4565-4574.
- Metspalu, L., Kuusik, A., Hiiesaar, K., Jõudu, J., Tartes, U. and Harak, M.** (2001). Simultaneous recording of gas exchange cyclicality, body movements and heartbeats in pupae of *Leptinotarsa decemlineata* Say made by infrared optical method. *Norw. J. Entomol.* **48**, 91-96.
- Metspalu, L., Kuusik, A., Hiiesaar, K. and Tartes, U.** (2002). Tonic immobility in adult Colorado potato beetle, *Leptinotarsa decemlineata* (Coleoptera: Chrysomelidae) evoked by mechanical and optical stimuli. *Eur. J. Entomol.* **99**, 215-219.
- Miller, P. L.** (1974). Respiration – aerial gas transport. In *The Physiology of Insecta*, Vol. 6 (ed. M. Rockstein), pp. 345-402. New York: Academic Press.
- Miller, P. L.** (1981). Ventilation in active and in inactive insects. In *Locomotion and Energetics in Arthropods* (ed. C. F. Herreid and C. R. Fourtner), pp. 367-390. New York: Plenum Press.
- Punt, A., Parser, W. J. and Kuchlein, J.** (1957). Oxygen uptake in insects with cyclic carbon dioxide release. *Biol. Bull.* **112**, 108-117.
- Schneiderman, H. A.** (1960). Discontinuous gas exchange in insects: role of the spiracles. *Biol. Bull.* **166**, 494-528.
- Sláma, K.** (1984). Recording of haemolymph pressure pulsations from the insect body surface. *J. Comp. Physiol.* **154**, 635-643.
- Sláma, K.** (1988). A new look at insect respiration. *Biol. Bull.* **175**, 289-300.
- Sláma, K.** (1999). Active regulation of insect respiration. *Ann. Entomol. Soc. Am.* **92**, 916-929.
- Sláma, K.** (2003). Mechanical aspects of heartbeat reversal in pupae of *Manduca sexta*. *J. Insect Physiol.* **49**, 645-657.
- Sláma, K. and Neven, L.** (2001). Active regulation of respiration and circulation in pupae of the codling moth (*Cydia pomonella*). *J. Insect Physiol.* **47**, 1321-1336.
- Tartes, U., Kuusik, A. and Vanatoa, A.** (1999). Diversity in gas exchange and muscular activity patterns in insects studied by a respirometer-actograph. *Physiol. Entomol.* **24**, 150-157.
- Tartes, U., Vanatoa, A. and Kuusik, A.** (2002). The insect abdomen – a heartbeat manager in insects? *Comp. Biochem. Physiol.* **133A**, 187-199.
- Taylor, P.** (1977). A continuously recording respirometer, used to measure oxygen consumption and estimate locomotor activity in tsetse flies, *Glossina morsitans*. *Physiol. Entomol.* **2**, 241-245.
- Van Voorhies, W. A., Melvin, R. G., Ballard, J. W. O. and Williams, J. B.** (2008). Validation of manometric microrespirometers for measuring oxygen consumption in small arthropods. *J. Insect Physiol.* **54**, 1132-1137.
- Wasserthal, L. T.** (1996). Interaction of circulation and tracheal ventilation in holometabolous insects. *Adv. Insect Physiol.* **26**, 297-351.
- Wobschall, A. and Hetz, S. K.** (2004). Oxygen uptake by convection and diffusion in diapausing moth pupae (*Attacus atlas*). *Int. Congr. Ser.* **1275**, 157-164.
- Woodman, J. D., Cooper, P. D. and Haritos, V. S.** (2007). Cyclic gas exchange in the giant burrowing cockroach, *Macropanesthia rhinoceros*: effect of oxygen tension and temperature. *J. Insect Physiol.* **53**, 497-504.
